# Supplementary material for: A glutenin protein corona ameliorated TiO2 nanoparticle-induced gut barrier dysfunction and altered the gut microbiota composition
Source: Royal Society of Chemistry journal article supplement (doi:10.1039/d4fo04355c), 2024-01-01
Supplement: d4fo04355c1.pdf [file d4fo04355c1.pdf]

## Supporting Information

### **Glutenin protein corona ameliorated TiO<sub>2</sub> nanoparticle-induced gut barrier dysfunction and altered gut microbiota composition**

#### **Methods:**

**ABTS Radical Scavenging Assay.** The detection of ABTS radical scavenging ability was performed according to the literature with slight changes.<sup>1</sup> The ABTS mother solution was obtained by mixing 10 mL of 7 mmol/L ABTS solution with 178 µL of 140 mmol/L potassium persulfate solution in the dark for 12 hours. The working solution with OD<sub>734 nm</sub>=0.7 was obtained by diluting the stock solution. The absorbance was measured at 734 nm after mixing 1 mL of the working solution with 1 mL of digestive solution in the dark at room temperature for 1 h.

**DPPH Radical Scavenging Assay.** The measurement of DPPH scavenging activity was performed with some changes according to the previous literature.<sup>2</sup> Samples were mixed with DPPH (0.04 mg/mL in absolute ethyl alcohol) at the ratio of 1:1 in the 96-well plate and incubated at 37°C in the dark for 30 min. The absorbance was read at 517 nm.

**Hydroxyl radical scavenging Assay.** The hydroxyl radical scavenging activity was measured according to the method reported in the literature.<sup>3</sup> One milliliter of samples, 1 mL 6 mmol/L FeSO<sub>4</sub>, 1 mL 6 mmol/L H<sub>2</sub>O<sub>2</sub>, and 1 mL 6 mmol/L of ethanol salicylic acid solution were added consecutively and incubated at 37°C for 1 h. After incubated, the reaction solution was transferred to a 96-well plate and the absorbance was

23 measured at 510 nm.

24 **Total reducibility Assay.** The total reducibility assay was slightly modified  
25 according to the method reported previously.<sup>4</sup> Mix 2.5 mL samples, 2.5 mL 0.02 mol/L  
26 PBS, 2.5 mL 1% (w/v) potassium ferricyanide and incubate at 55°C for 20 minutes.  
27 Then add 2.5 mL 10% (w/v) trichloroacetic acid followed by a 1000 g centrifugation  
28 for 15 min. The supernatant (2.5 mL) was mixed with 2.5 mL of distilled water and 0.5  
29 mL 0.1% (w/v) ferric chloride, and the absorbance at 700 nm was measured after  
30 10 min of incubation at room temperature in the dark.

31

32

### 33 **Supplementary Figures**

34 **Supplementary Figure 1. The antioxidant activity of digestive fluid with different**  
35 **treatments.** (A-D) The ABTS radical scavenging rate (A), DPPH radical scavenging  
36 rate (B), Hydroxyl radical scavenging rate (C) and Reducing power (D) of digestive  
37 fluids with TiO<sub>2</sub> nanoparticles, glutenin, and Glu-TiO<sub>2</sub> corona during simulated  
38 digestion. Bars assigned different lowercase letters are significantly different ( $p < 0.05$ ).

39 **Supplementary Table 1. Primers used in qRT-PCR experiments.**

40 **Supplementary Table 2. The visceral index of mice with different groups.**

41 **Supplementary Figure 1.**

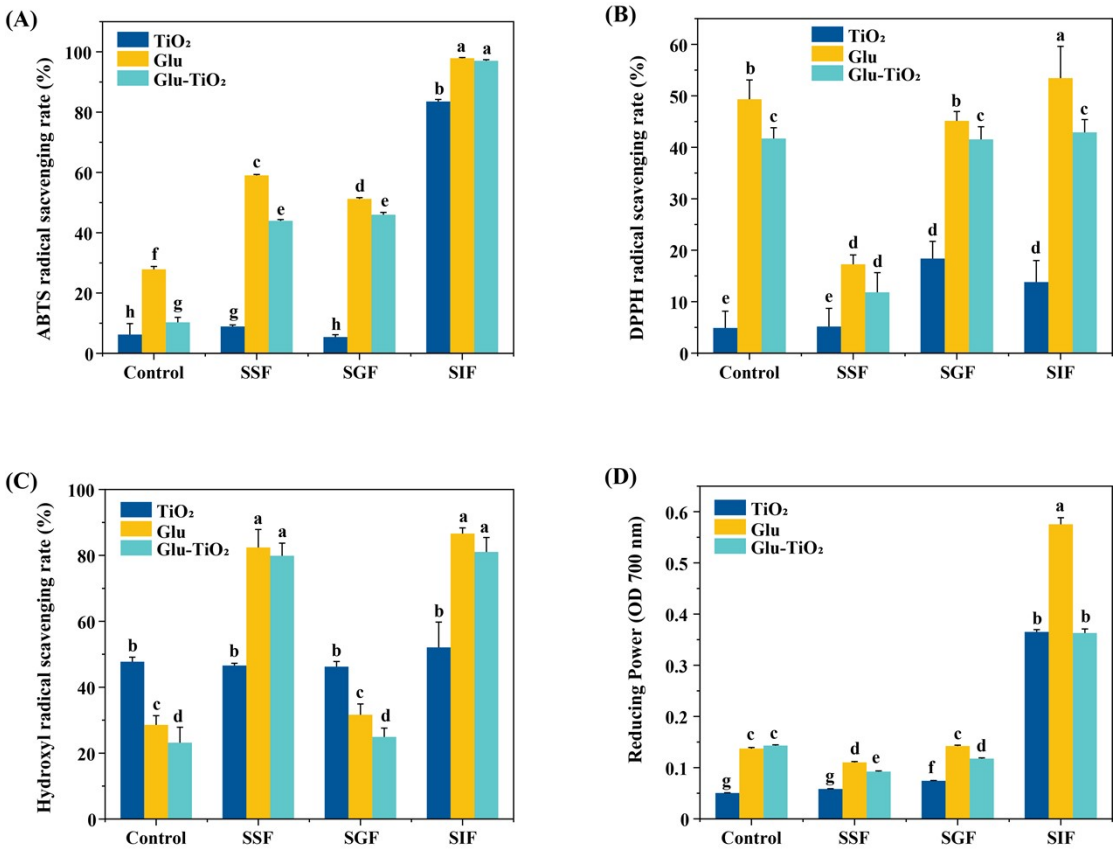

42

43

44 **Supplementary Table 1. Primers used in qRT-PCR experiments.**

| Gene               | Forward Primer                 | Reverse Primer                  |
|--------------------|--------------------------------|---------------------------------|
| <i>Mouse Cldn1</i> | 5'-TGCCCCAGTGGAAGATTTACT-3'    | 5'-CTTTGCGAAACGCAGGACAT-3'      |
| <i>Mouse Tjp1</i>  | 5'-GAGCGGGCTACCTTACTGAAC-3'    | 5'-GTCATCTCTTTCCGAGGCATTAG-3'   |
| <i>Mouse Ocln</i>  | 5'-TTGAAAGTCCACCTCCTTACAGA-3'  | 5'-CCGGATAAAAAGAGTACGCTGG-3'    |
| <i>Mouse Cldn7</i> | 5'-AGGGTCTGCTCTGGTCCTT-3'      | 5'-GTACGCAGCTTTGCTTTCA-3'       |
| <i>Mouse Cldn2</i> | 5'-GATTGGAGAGGCTCTGTACTTG-3'   | 5'-TAGTTGGTACGATTGCCCTG-3'      |
| <i>Mouse Muc2</i>  | 5'-GGCTCGGAACTCCAGAAAGAAG-3'   | 5'-CTCGGCAGTCAGACGCAAAG-3'      |
| <i>Mouse Gapdh</i> | 5'-TGAATACGGCTACAGCAACA-3'     | 5'-AGGCCCTCCTGTTATTATG-3'       |
| <i>Human Cldn1</i> | 5'-GATGAGGTGCAGAAGATGAG-3'     | 5'-GGACAGGAACAGCAAAGTAG-3'      |
| <i>Human Ocln</i>  | 5'-CGCTGCTGTAACGAGGCT-3'       | 5'-CCAATGTCGAGGAGT-3'           |
| <i>Human Tjp1</i>  | 5'-ATCAGGGACATTCAATAGCGTAGC-3' | 5'-CAAGATAGTTTGGCAGCAAGAGATG-3' |
| <i>Human Gapdh</i> | 5'-CGGAGTCAACGGATTTGGTC-3'     | 5'-GACAAGCTTCCCGTTCTCAG-3'      |

45

46

47

48 **Supplementary Table 2.** The visceral index of mice with different groups.

|                                       | Heart (mg/g)               | Liver (mg/g)              | Spleen (mg/g)            | Lung (mg/g)              | Kidney<br>(mg/g)          | Brain (mg/g)              |
|---------------------------------------|----------------------------|---------------------------|--------------------------|--------------------------|---------------------------|---------------------------|
| Control                               | 5.91 ± 0.72 <sup>a,*</sup> | 48.83 ± 3.90 <sup>a</sup> | 5.32 ± 0.77 <sup>a</sup> | 7.56 ± 1.19 <sup>a</sup> | 12.79 ± 0.56 <sup>a</sup> | 14.88 ± 3.41 <sup>a</sup> |
| TiO <sub>2</sub> 100 mg/kg            | 6.28 ± 1.56 <sup>a</sup>   | 44.18 ± 4.61 <sup>a</sup> | 3.93 ± 0.86 <sup>a</sup> | 7.16 ± 0.56 <sup>a</sup> | 12.84 ± 0.66 <sup>a</sup> | 19.49 ± 4.98 <sup>a</sup> |
| TiO <sub>2</sub> 500 mg/kg            | 6.35 ± 0.93 <sup>a</sup>   | 45.87 ± 2.08 <sup>a</sup> | 3.86 ± 0.85 <sup>a</sup> | 6.38 ± 0.94 <sup>a</sup> | 12.99 ± 0.60 <sup>a</sup> | 16.43 ± 1.77 <sup>a</sup> |
| Glu-TiO <sub>2</sub> Corona 100 mg/kg | 5.82 ± 0.39 <sup>a</sup>   | 45.41 ± 2.84 <sup>a</sup> | 4.26 ± 1.37 <sup>a</sup> | 7.84 ± 1.43 <sup>a</sup> | 12.95 ± 0.65 <sup>a</sup> | 19.99 ± 1.53 <sup>a</sup> |
| Glu-TiO <sub>2</sub> Corona 500 mg/kg | 6.34 ± 1.09 <sup>a</sup>   | 47.18 ± 2.63 <sup>a</sup> | 3.41 ± 0.39 <sup>a</sup> | 6.49 ± 0.54 <sup>a</sup> | 12.39 ± 0.96 <sup>a</sup> | 18.36 ± 1.00 <sup>a</sup> |

49 \* Values with different inline letters within a row were significantly different ( $p < 0.05$ ).

## 51 **References:**

- 52 1 A. K. Arise, A. M. Alashi, I. D. Nwachukwu, O. A. Ijabadeniyi, R. E. Aluko and E. O. Amonsou, Antioxidant  
53 activities of bambara groundnut (*Vigna subterranea*) protein hydrolysates and their membrane ultrafiltration  
54 fractions, *Food Funct.*, 2016, **7**, 2431-2437.
- 55 2 X.-X. Zhang, Z.-J. Ni, F. Zhang, K. Thakur, J.-G. Zhang, M. R. Khan, R. Busquets and Z.-J. Wei,  
56 Physicochemical and antioxidant properties of Lycium barbarum seed dreg polysaccharides prepared by  
57 continuous extraction, *Food Chem.: X*, 2022, **14**, 100282.
- 58 3 H. Shan, Y. Guo, J. Li, Z. Liu, S. Chen, B. Dashnyam, D. J. McClements, C. Cao, X. Xu and B. Yuan, Impact of  
59 whey protein corona formation around TiO<sub>2</sub> nanoparticles on their physiochemical properties and  
60 gastrointestinal fate, *J. Agric. Food Chem.*, 2024, **72**, 4958-4976.
- 61 4 Z. Zhu, X. Song, Y. Jiang, J. Yao, Y. Jiang, Z. Li and F. Dai, Chemical structure and antioxidant activity of a  
62 neutral polysaccharide from Asteris Radix et Rhizoma, *Carbohydr. Polym.*, 2022, **286**, 119309.

63
